# Supplementary material for: Profiling embryonic stem cell differentiation by MALDI TOF mass spectrometry: development of a reproducible and robust sample preparation workflow
Source: Royal Society of Chemistry journal article supplement (doi:10.1039/c9an00771g), 2019-01-01
Supplement: c9an00771g1.xlsx [file c9an00771g1.xlsx]

## Sheet: Sheet1
mass list	Relative intensity
	2i 1 T1	2i 1 T2	2i 1 T3	2i 1 T4	2i 1 T5	2i 2 T1	2i 2 T2	2i 2 T3	2i 2 T4	2i 2 T5	2i 3 T1	2i 3 T2	2i 3 T3	2i 3 T4	2i 3 T5	2i r 1 T1	2i r 1 T2	2i r 1 T3	2i r 1 T4	2i r 1 T5	2i r 2 T1	2i r 2 T2	2i r 2 T3	2i r 2 T4	2i r 2 T5	2i r 3 T1	2i r 3 T2	2i r 3 T3	2i r 3 T4	2i r 3 T5
2006.46	0	0	0	0	0	0	0	0	0	0	0	0	0	0	0	4.16	0	0	4.36	0	0	0	0	0	0	0	0	0	5.48	0
2026.66	0	0	0	0	0	0	0	0	0	0	0	0	0	0	0	0	0	0	0	0	0	0	0	0	0	0	0	0	4.95	4.97
2046.28	0	0	0	0	0	0	0	0	0	0	0	0	0	0	0	0	0	0	0	0	0	0	0	0	0	0	8.18	6.57	5.01	0
2056.88	0	0	0	0	0	0	0	0	0	0	0	0	0	0	0	0	0	0	0	0	0	0	0	0	6.55	0	0	0	0	0
2147.47	14.0781	11.9377	12.0525	12.5825	11.8433	13.4656	11.7181	12.0765	12.5626	15.3818	10.0938	10.313	9.31796	10.9372	6.72391	11.3677	13.3026	13.5264	13.2203	13.7528	13.3282	13.6389	12.3321	13.9572	12.5367	9.95	9.4	8.06	9.61	10.3949
2186.84	0	0	0	0	0	0	0	0	0	0	0	0	0	0	0	0	3.72	0	0	0	0	0	0	0	0	0	0	0	0	0
2437.36	9.33556	6.84094	6.15091	7.11469	7.08212	0	7.06399	7.02341	0	0	9.10103	8.44993	7.22101	7.81217	7.95187	15.1987	16.4785	15.078	15.2536	15.3082	12.3269	15.3657	12.6606	13.1301	13.9206	18.0955	14.7564	14.9924	16.4966	17.6479
2522.05	0	0	0	0	0	0	0	7.48973	0	0	0	0	0	0	0	0	0	0	4.92401	0	0	5.73	0	0	0	0	0	0	4.71	4.69888
2820.82	0	0	0	0	0	0	0	0	0	0	0	0	0	0	0	5.07	0	0	4.27	0	0	5.52	0	0	0	0	0	6.21	0	0
3072.17	11.2135	10.5593	10.4206	8.997	8.76336	12.2036	11.7238	11.0308	9.32257	12.3293	11.7494	12.235	11.2471	10.3532	10.8056	13.5925	12.03	12.9531	10.186	8.77871	11.4011	17.215	20.506	16.1907	15.4448	14.6375	12.6406	15.7655	10.5787	5.05
3097.6	10.9553	9.53606	10.1581	9.02091	9.98271	12.3457	10.8532	11.1238	11.9727	11.395	12.0981	12.4742	10.8298	11.6174	11.2028	0	0	0	0	0	0	5.96	10.1429	7.96	0	0	0	0	0	0
3231.06	6.06744	6.05541	6.18639	5.07341	0	0	0	0	7.26015	0	7.12091	7.52256	7.42911	6.61687	6.88657	0	0	0	0	0	0	0	0	0	0	0	0	0	0	0
3281.86	15.2653	15.0552	15.272	14.5163	13.1836	15.7239	14.9271	15.531	13.6168	16.4534	18.635	18.6717	15.8596	17.6288	15.2775	27.9281	25.327	26.9173	23.0471	19.4854	20.2265	36.3103	36.642	30.751	27.7707	33.3236	28.9056	33.3903	25.7116	21.122
3370.66	0	5.58246	5.84369	5.52146	0	0	0	0	0	0	6.06701	0	0	0	0	0	0	0	0	0	0	0	0	0	0	0	0	0	0	0
3412.32	60.037	55.8503	60.4249	59.2108	52.3793	70.4774	68.9809	67.3353	69.6001	66.8961	67.1585	65.2887	62.2513	64.1885	63.2882	9.69	6.32	5.92	9.51	5.68	21.3414	18.5085	35.4252	27.6773	19.0324	12.7156	8.98	11.8643	8.14	0
3445.97	0	0	0	0	0	0	0	0	0	0	0	0	0	0	0	3.97	4.53	4.72	4.95	0	0	0	0	0	0	0	0	6.2	0	4.99
3723.47	0	0	0	0	0	0	0	8.56766	0	11.0543	0	0	8.56826	6.78834	6.28897	0	0	0	0	0	0	0	0	0	0	0	0	0	0	0
3741.95	18.7381	17.4258	17.5464	17.9522	16.9372	20.5452	18.5118	18.4537	21.0272	20.2777	14.5198	13.6585	13.7621	13.0953	12.3557	12.9664	11.969	12.2337	12.886	10.9665	19.5724	17.3137	18.0275	16.8656	16.5444	9.47647	10.4361	10.4419	11.1687	10.0219
3892.09	0	5.15479	5.24114	0	5.81792	0	0	0	0	0	6.07596	6.72686	7.14979	6.03014	6.36643	4.17	3.96	4.51	0	0	0	6.15	7.27	6.53	6.66	5.31	0	0	0	0
3985.59	8.4945	7.1088	8.24724	6.90493	7.64209	9.07046	8.00749	7.43134	7.76702	10.1103	9.34546	11.1553	8.44365	7.95705	8.60986	4.96	3.76	4.67	4.58	0	6.56	5.92	11.3047	9	6.18	5.45	6.14	7.54	4.89	0
4004.42	0	0	0	0	0	0	0	0	0	0	0	0	0	0	0	6.55	5.9823	4.46	6.24	4.94	0	5.85	6.17	0	0	8.99227	8.22	6	8.33	7.81047
4144.93	0	0	0	0	0	0	0	0	0	0	0	0	0	0	0	4.42	4.42	4.13	0	4.35	5.16	0	0	0	0	7.54	6.11	5.87	7.73	6.82
4228.77	25.6478	23.2555	23.6852	22.3131	21.6384	24.6347	21.9866	22.9444	24.5849	25.4377	28.4394	34.1843	27.2168	26.81	25.0755	26.6842	27.1888	26.2529	25.7146	21.4127	23.4239	36.5242	37.6092	33.0495	28.6108	30.7277	26.769	29.4667	26.5603	17.3305
4541.11	11.3038	11.5042	12.6123	10.0351	11.0204	14.11	11.8537	12.7814	11.8664	12.741	11.3086	11.6754	14.3618	14.1143	12.864	9.01	3.99	5.63	7.23	3.68	13.61	12.9987	16.7982	14.7371	10.5332	9.25	7.8	11.7368	0	0
4587.73	7.6009	6.41359	6.82975	6.78752	6.50002	8.54315	7.91172	7.37478	8.7026	8.88547	8.94729	8.01993	7.353	6.96026	7.63688	15.3486	14.4112	15.4797	14.1189	14.9647	17.3014	19.6197	17.9383	16.9532	16.3598	17.6772	16.2086	19.0602	17.1262	15.7024
4627.5	7.64561	8.99537	9.56361	8.86649	9.34473	9.31204	11.5148	11.5985	11.8092	9.00203	11.5072	12.1747	9.31526	12.0849	11.2128	6.74	3.87	3.85	4.14	3.46	10.6113	7.95	11.1831	10.7337	0	4.75	0	0	0	0
4657.72	0	0	0	5.66523	0	0	0	0	8.03983	0	0	0	0	0	7.48644	0	0	0	0	0	0	0	0	0	0	0	4.68	0	0	0
4875.2	100	100	100	100	100	100	100	100	100	100	100	100	100	100	100	100	100	100	100	100	100	100	100	100	100	100	100	100	100	100
4901.9	27.5505	26.1303	26.4004	25.2462	24.7932	27.5444	26.373	27.938	27.4041	25.8175	27.7521	28.3653	26.9851	27.0685	27.1212	28.6368	28.7352	29.144	29.2818	29.8571	33.2173	31.3196	32.3498	31.7323	31.7529	27.7466	28.6438	29.3527	28.7639	29.9062
4945.16	0	0	0	0	0	0	0	0	0	0	5.79572	0	0	6.45681	0	11.8863	0	11.4612	6.03	12.3859	0	13.3228	11.9412	0	6.52	13.5502	13.0822	5.76	0	12.944
5008.79	6.83184	5.31614	6.12299	4.86081	0	0	0	0	0	0	6.57097	7.05254	7.25649	6.11458	6.61515	0	0	0	0	0	0	0	5.81	0	0	0	0	0	0	0
5044.08	7.08716	5.60749	6.60865	5.44174	6.08497	9.09104	8.81848	0	7.71448	0	7.3802	8.50169	8.24556	6.67648	7.23331	3.78	3.3	3.11	3.81	0	5.97	6.74	8.42	8.11	6.03	0	0	0	0	0
5200.11	7.64698	8.31612	7.95829	8.00727	8.38346	11.222	10.9231	11.963	12.6419	10.6334	8.752	9.73577	8.31691	9.45711	9.39957	7.2	6.84	6.84189	7.57	6.82	11.0756	10.5056	11.3442	11.4808	10.9891	8.95	9.26	9.09	8.42	8.14
5228.89	0	0	0	0	0	0	0	0	0	0	0	0	0	0	0	5.41	4.49005	0	0	0	0	6.3822	7.76	7.36	6.42	5.62	0	8.28	4.43	0
5368.53	0	0	0	0	0	0	0	0	0	0	5.68942	6.60824	0	0	5.81243	3.77	0	0	0	0	0	0	5.37	0	0	0	0	0	0	0
5405.2	0	0	0	0	0	0	0	0	0	0	0	0	0	0	0	3.42	2.86	0	3.15	0	0	5.19	0	5.43	0	0	0	0	0	0
5437.7	0	0	0	0	0	0	0	0	0	0	0	0	0	0	0	5.64487	5.80722	5.23	6.14	4.89	6.87592	9.34	10.2712	8.25	5.19	8.32082	7.62	8.34	6.93	4.55
5556.88	0	0	0	0	0	0	0	0	0	0	0	0	0	0	0	0	3.75	0	0	0	0	0	0	0	0	4.28	4.14	0	4.04	0
5586.78	23.2058	27.3035	25.3996	22.0237	27.6368	41.0006	41.7273	44.1809	40.6641	47.1939	28.7231	30.9405	37.7704	35.5655	33.7088	8	0	2.92	3.36	3.24207	11.4223	7.22	9.3	9.7	0	0	0	0	3.46	0
5619.06	0	0	0	0	0	0	0	0	0	0	0	0	0	0	0	0	3.3	3.37	3.49	0	0	6.15	9.19	8.76	6.79869	0	0	8.2	0	0
5965.14	7.88644	7.80883	7.51472	8.45693	8.02826	9.42193	10.9104	11.1823	10.9783	11.7388	9.14324	9.00447	8.93543	9.24399	8.56413	8.23	7.1	7.55	7.44	7.56	9.42	10.2338	10.1665	11.0924	10.5559	9.24	9.58	9.27288	9.23	8.97
5988.54	11.4959	12.1194	11.8616	10.5327	10.8036	11.7741	11.929	11.9919	13.1096	13.2743	13.3221	11.8476	12.1862	12.5613	13.2183	0	0	0	0	0	0	0	0	0	0	0	0	0	0	0
6009.69	14.7152	12.3527	13.1442	11.8429	12.1347	15.5775	13.3073	14.6768	13.9509	14.7415	16.6808	15.8149	14.3078	14.248	14.1334	34.0509	34.2714	32.6715	32.6718	34.4968	26.8543	36.8134	31.758	31.5573	28.3378	44.4984	42.7273	41.078	41.5229	43.9343
6037.85	8.21441	8.2863	8.48396	7.32605	7.46334	9.23025	9.81997	0	8.70088	10.4308	7.31538	8.25064	7.3875	8.05037	7.98693	0	0	0	0	0	0	0	0	0	0	0	0	0	0	0
6040.63	0	0	0	0	0	0	0	0	0	0	0	0	0	0	9.05161	0	0	0	0	0	0	0	0	0	0	0	0	0	0	0
6090.78	15.5391	15.8335	16.5457	13.8641	15.1179	20.8021	19.2385	17.668	19.4493	19.311	14.9301	16.6671	16.1584	16.8001	14.8872	11.1742	9.34447	9.89	10.3509	8.25	11.6583	13.4754	17.5204	16.3663	14.1027	9.32	9.18	12.05	7.93	8.62
6149.31	32.7898	33.224	35.6143	33.7975	34.1961	40.3813	41.3699	42.8199	44.4696	42.5525	35.2104	37.269	35.5368	36.6796	36.4465	19.0994	16.2261	16.9262	17.0154	14.4646	24.3764	29.1991	38.0878	32.6601	31.1109	19.841	19.889	28.5561	15.5477	13.3396
6197.71	33.2577	32.2902	36.2105	33.9891	34.7553	43.1621	44.9119	44.8914	46.3706	48.2139	32.3314	38.0377	35.1829	37.7162	38.5781	5.91	2.79	3.17	4.85	2.48	10.4852	9.38	17.4466	14.6344	7.37	3.77	6.62	5.85	0	0
6243.81	0	5.77884	0	5.60274	0	0	0	0	0	0	0	0	0	0	0	0	0	0	0	0	0	0	0	0	0	0	0	0	0	0
6467.81	12.0224	13.1248	13.46	13.281	13.0051	16.6597	15.9485	15.4926	16.1136	16.5129	12.913	13.1783	14.0418	13.762	14.4554	2.96	0	0	0	0	0	0	6.52	5.64	0	0	0	0	0	0
6505.72	0	6.59019	0	0	44.4033	8.30427	0	7.62032	0	7.6569	6.14166	6.85523	6.36915	0	0	0	0	0	0	0	0	0	0	0	0	0	0	0	0	0
6569.26	43.8624	44.1373	44.896	44.5941	0	54.3407	52.4238	49.6018	52.9954	52.0675	48.0689	48.304	48.4169	51.7949	50.1335	37.4606	33.5652	37.2536	31.2034	27.0741	39.4583	49.9534	62.1044	51.9532	50.8229	40.7168	41.7258	50.7484	34.5445	26.4057
6613.13	0	0	0	0	0	0	0	0	0	0	0	0	0	0	0	0	0	0	0	0	0	0	4.77	0	0	0	0	0	0	0
6625.43	0	0	0	0	0	0	0	0	0	0	0	0	0	5.23521	0	0	0	0	0	0	0	0	0	0	0	0	0	0	0	0
6763.35	0	0	0	0	0	0	0	0	0	0	0	0	0	0	0	0	0	3.28	0	0	0	0	0	0	0	0	0	0	0	0
6816.77	42.3133	43.8155	45.7522	40.6883	44.7859	56.0118	52.2605	51.7946	52.4975	54.6927	49.8503	58.6547	54.27	54.4067	54.3171	16.8649	9.99	9.84	11.9965	8.67	32.2632	23.5108	51.3172	48.0982	24.9865	12.8854	14.1288	23.5455	8.08	0
6896.49	13.4792	0	15.6265	14.548	0	0	0	0	0	0	0	0	0	0	0	10.3679	8.58	8.23	8.61	7.27	14.7929	11.03	16.3991	16.1029	11.7246	9.41	9.51	11.1228	8.35141	7.64
6940.88	25.0578	28.7385	27.6521	24.2883	29.2645	40.2538	39.4065	40.5445	37.9308	40.4211	29.3734	30.5039	35.8112	34.008	35.4576	10.3695	5	3.92	5.12	4.65	20.0104	10.9762	17.5958	20.0022	7.53	5.63	4.03	7.5	3.11	0
6977.99	0	0	0	0	0	0	0	0	0	0	0	0	0	0	0	9.9	8.45	6.92	8.37	5.93	13.3379	12.9753	17.5092	16.342	13.5999	8.82	8.65	12.7763	7.95	4.9
7125.31	0	0	0	0	0	0	0	5.58197	0	0	0	0	0	0	0	2.64	2.50582	0	0	0	3.67	4.17	5.8	5.21	4.62	3.54	3.76	4.1	2.98	0
7149.18	0	0	0	0	0	0	0	0	0	0	0	0	0	0	0	6.12	5.61	5.31	5.39178	3.91	4.70838	7.21006	7.00435	6.53	5.87	5.9	6.7	7.11	4.72	2.95
7213.48	0	0	0	0	0	0	0	0	0	0	0	0	0	0	0	0	2.39	2.37	2.72	0	0	3.88	0	0	0	3.29	3.44	4.45	2.85	0
7253.13	0	0	0	0	0	0	0	0	0	0	4.89403	0	0	0	0	8.71	7.67	6.63	9.23	6.42	9.42	13.6784	15.5733	13.7277	11.9547	10.8265	9.87	14.7257	8.52	5.37
7412.08	0	0	0	0	0	0	0	0	0	0	0	0	0	0	0	4.19	3.41	3.38	3.39	2.85	4.3	5.7	5.8	5.11	5.27	4.65	5.36	6.37	4.58	2.9
7439.4	4.59779	4.77093	5.3641	4.36914	4.82459	6.47767	7.20678	6.51505	6.26688	6.34436	4.95349	0	5.93265	5.91187	6.02736	3.09	2.62	2.9	2.92	2.59	3.57	3.83	4.42	4.31	3.87	0	0	4.56	0	0
7585.01	8.19653	10.1711	8.81712	8.02197	10.7618	15.7834	16.3193	16.0576	15.874	19.0243	9.42274	10.8581	14.622	13.3991	13.226	0	0	0	0	0	0	0	0	0	0	0	0	0	0	0
7791.77	4.48916	4.38104	5.04522	4.15125	4.37322	6.06312	0	0	0	0	4.9601	5.47342	0	0	4.98094	0	0	0	0	0	0	0	0	0	0	0	0	0	0	0
7837.27	0	0	0	0	0	0	0	0	0	0	0	0	0	0	0	3.12	3.24	3.29146	2.63252	2.37	0	4.27	4.62	4.29	4.21	0	2.67	0	0	0
7980.94	8.17695	8.83819	9.8824	8.95245	9.69575	11.4147	10.7226	12.0401	10.7452	11.4739	9.07829	10.8946	9.21476	10.2329	10.312	2.57	1.86	0	2.22918	0	3.96	2.91574	6.38	6.12	4.17	0	0	0	0	0
8299.86	4.94094	5.04807	4.87912	4.82972	4.80334	8.68406	8.33698	8.28339	8.40218	8.24556	7.34725	6.67774	7.02178	6.62649	7.32965	4.95	4.16	4.88	4.59	4.04	7.54	7.69	7.27	7.56	8.29	7.57	7.46	8.35	8.07	6.9
8355.46	4.72643	4.28448	4.49687	3.96657	0	6.42339	6.5721	6.49131	6.98482	7.0138	6.432	7.35995	6.5146	6.93485	7.35472	2.28	1.7	1.82	2.08	1.84574	2.95	3.17	0	0	3.3	3.31	2.82	0	2.77	0
8470.32	32.4767	30.74	34.4348	32.0479	30.2785	34.4802	33.3409	34.442	35.5931	33.3146	33.2565	37.8023	33.5226	33.9663	34.8771	15.6137	14.5056	15.7067	15.7524	12.3672	19.9316	21.9504	28.451	24.2148	22.8541	16.506	14.8777	18.1102	14.1537	9.52
8517.84	5.86648	5.12568	5.98485	5.22297	5.04228	5.43177	0	5.46052	5.63537	0	5.0409	5.75811	4.91867	4.92108	5.14187	0	0	1.99	2.3	1.76	0	0	3.68	0	0	0	0	0	0	0
9186.53	4.15572	4.48148	4.50865	4.28406	4.42604	0	0	5.37013	5.77182	0	4.3934	0	4.10499	0	4.12345	4.07	3.59	3.94	4.03	4.03	6.16	5.95	6.12	5.04	5.51	4.13	4.55	4.03	4.5	4.37
9272.52	0	4.07066	3.71487	0	3.73613	0	4.72804	4.8867	0	0	3.72269	0	0	0	0	0	0	0	0	0	0	0	3.49	3.23539	0	0	0	0	0	0
9335.4	3.81779	3.88972	3.95661	3.3608	0	6.04781	5.42786	5.65023	6.06336	5.70427	0	0	0	0	0	0	0	0	0	0	0	0	3.28	0	0	0	0	0	0	0
9914.38	0	0	0	0	0	0	0	0	4.56456	0	0	0	0	0	0	2.84	2.2806	2.63	2.99	2.69	3.67	3.42	3.79	4.06	3.71	2.95	2.88101	3.74	2.86	2.59209
10035.1	3.10622	3.17804	3.59984	3.41735	0	4.29337	4.90022	4.08742	4.83036	0	3.09428	0	3.816	3.30783	4.00633	0	0	0	0	0	0	0	0	0	0	0	0	0	0	0
10101.2	0	3.11937	0	2.8063	0	4.4351	4.341	4.2385	4.41093	4.92999	3.11412	0	0	3.26949	3.46255	0	0	0	0	0	0	0	3.16	0	0	0	0	0	0	0
10481.1	3.27017	3.31383	3.77818	3.06572	3.13316	5.14857	4.8053	4.66239	4.98686	0	4.47302	4.64853	4.49785	4.14761	4.19349	3.82	3.61	3.23	3.87815	3	5.67	6.63	9.48	8.27	6.59	4.11	3.83	6.08	3.64	2.41
10515.7	0	0	0	0	0	0	0	0	0	0	0	0	0	0	0	0	0	1.18	1.65	0	0	0	0	0	0	0	0	0	0	0
10742.1	2.84974	2.71607	0	0	0	0	3.42335	0	3.73475	0	3.24738	3.91675	3.66925	3.46478	3.50503	3.51	2.99	2.94	3.21	2.68	3.77	4.58	6.06	5.14	4.06	3.15	3.46053	4.43712	2.6	1.71
10833.8	0	0	0	0	0	0	0	0	0	0	2.93437	3.31599	3.02698	0	0	2.2056	2.02	1.73	2.19	1.69	2.99	3.65	4.41	3.91	3.56	2.35	2.41	3.66	2.03	1.38
10895	3.41381	3.94555	4.00546	3.15512	4.0078	5.63108	5.80513	5.0175	4.85466	5.26738	5.1868	5.26803	5.19521	4.66157	5.12365	5.01	4.4	3.8	4.78	3.49	6.81	8.21	10.9538	9.12	7.82	6.16	5.17045	7.89117	4.92	2.78
10974.9	0	0	0	0	0	3.91649	3.97173	3.90267	3.73732	4.45356	0	0	0	3.08537	3.11276	0	0	0	0	0	0	0	0	0	0	0	0	0	0	0
11132.2	0	0	0	0	0	0	0	0	0	0	0	0	0	0	0	2.41	1.72	1.63377	1.84	1.74	3.3	2.96	4.25	3.9	2.7	2.24	2.38	3.19	2.16	0
11170.9	0	0	0	0	0	0	0	0	0	0	0	0	0	0	0	2.51	1.46	1.41	1.56	1.31	3.43	2.25	3.42	3.29	0	1.6	0	2.02	1.31	0
11186.5	10.3126	13.3053	11.8989	11.4062	15.1011	22.6216	23.1336	24.5673	23.3948	26.3191	11.6083	12.63	17.884	16.9941	17.116	0	0	0	0	0	0	0	0	0	0	0	0	0	0	0
11903.9	0	0	0	0	0	0	0	0	0	0	0	0	0	0	0	1.22	0.876	0	1.14	1.04	0	1.38	2.04	0	0	1.3	0	0	1.36	0
12042.6	3.79094	3.58188	4.24107	3.58365	4.06606	4.96773	4.91384	4.62479	4.92192	4.30957	4.16879	4.20066	4.51722	4.38409	4.61396	5.93266	5.74725	6.01	5.91	6.85	6.73	6.21	6.75	7.27	6.83	7.8882	7.56013	8.31	8.37	8.31
12106.8	0	0	0	0	0	0	0	0	0	0	0	0	0	0	0	1.34	1.24	1.23	1.49	1.4	1.47	1.47	0	0	0	1.62	1.68	2.06566	1.9	1.86
13555.5	0	0	0	0	0	0	0	0	0	0	0	0	0	0	0	0	0	0	0.747	0	0	0	0	0	0	0	0	0	0	0
13660.1	12.8621	15.8524	15.7055	14.3208	16.2549	21.8731	21.4415	20.7284	21.3027	21.3526	14.2575	17.1147	17.2015	18.2805	18.9849	2.26	1.26	1.14	1.53	1.18	5.4	3.02	7.56	8.13	3.55703	1.85	1.79	2.7	1.09782	0
13877	5.53071	7.49318	6.48696	5.99849	7.62898	10.6167	11.3956	10.7024	10.8807	11.1989	5.59956	6.35462	7.51414	7.97455	8.49267	0.972	0	0	0	0	2.48	1	1.97	2.7	0	0	0	0	0	0
13913.7	5.22761	7.34994	6.82263	6.30151	8.11623	10.6599	11.0883	11.329	10.9255	11.0943	5.82656	5.95527	7.83891	8.09737	8.81074	0.979	0	0	0	0	2.47	0.931	2.01	2.24	0	0	0	0	0	0
15193.7	1.8285	2.49575	1.98931	1.98224	2.65305	4.59281	4.61665	4.50461	4.44452	5.77288	1.9469	2.46856	3.07808	2.92296	3.27284	0	0	0	0	0	0	0	0	0	0	0	0	0	0	0
